# Supplementary material for: Immigrant-driven hunting and wildlife decline in an Afrotropical rainforest landscape
Source: Research Square preprint supplement (doi:10.21203/rs.3.rs-6700922/v1), 2026-01-13
Supplement: Supplementary file 1 [file 1aac601a103f4de7e95f4cbe.docx]

**Immigrant-driven hunting and wildlife decline in an Afrotropical rainforest landscape**

**Supplementary information**

**Table S1:** Full results of Bayesian regression models fitted on wildlife and hunting in the Ebo forest, Cameroon to investigate differences in hunting and wildlife patterns in the hunting territories of different human communities.

| **Species** | **Parameter** | **Estimate** | **Est.Error** | **l-95%CI** | **u-95%CI** | **Rhat** | **Bulk_ESS** | **Tail_ESS** |
| --- | --- | --- | --- | --- | --- | --- | --- | --- |
| Chimpanzee | Intercept | -1.89 | 0.26 | -2.41 | -1.40 | 1.00 | 3222 | 5092 |
| Area:BassaEast | -0.67 | 0.32 | -1.31 | -0.05 | 1.00 | 3715 | 5026 |
| Area:BassaWest | 0.09 | 0.35 | -0.58 | 0.77 | 1.00 | 3214 | 4589 |
| Area:Immigrant | -1.39 | 0.34 | -2.06 | -0.72 | 1.00 | 3033 | 4688 |
| Area:Yingui | -0.75 | 0.43 | -1.61 | 0.09 | 1.00 | 4388 | 5551 |
| Year | -0.28 | 0.11 | -0.51 | -0.06 | 1.00 | 4693 | 6033 |
| Village distance | 0.66 | 0.13 | 0.41 | 0.91 | 1.00 | 3673 | 4572 |
| Ruggednessedness | 1.12 | 0.13 | 0.87 | 1.38 | 1.00 | 4206 | 5073 |
| Elevationation | 0.08 | 0.14 | -0.20 | 0.35 | 1.00 | 3626 | 5117 |
| River distance | 0.02 | 0.10 | -0.18 | 0.22 | 1.00 | 4661 | 5429 |
| Survey effort | 0.84 | 0.42 | 0.18 | 1.79 | 1.00 | 6657 | 4714 |
| Area:BassaEast*Year | 0.27 | 0.18 | -0.08 | 0.64 | 1.00 | 6774 | 5681 |
| Area:BassaWest*Year | -0.10 | 0.18 | -0.44 | 0.25 | 1.00 | 6642 | 5985 |
| Area:Immigrant*Year | 0.14 | 0.15 | -0.16 | 0.44 | 1.00 | 6022 | 6506 |
| Area:Yingui*Year | 0.00 | 0.26 | -0.52 | 0.50 | 1.00 | 9360 | 5976 |
| Elephant | Intercept | -3.23 | 0.33 | -3.92 | -2.63 | 1.00 | 3663 | 5321 |
| Area:BassaEast | -1.27 | 0.39 | -2.04 | -0.51 | 1.00 | 6115 | 6434 |
| Area:BassaWest | -2.79 | 0.53 | -3.88 | -1.77 | 1.00 | 7500 | 6074 |
| Area:Immigrant | -0.90 | 0.39 | -1.67 | -0.15 | 1.00 | 5005 | 6194 |
| Area:Yingui | -1.96 | 0.70 | -3.38 | -0.64 | 1.00 | 10434 | 6175 |
| Year | 0.46 | 0.14 | 0.19 | 0.74 | 1.00 | 7861 | 6182 |
| Village distance | 1.17 | 0.17 | 0.86 | 1.51 | 1.00 | 5292 | 6310 |
| Ruggedness | -0.49 | 0.17 | -0.83 | -0.16 | 1.00 | 5992 | 6240 |
| Elevation | 1.33 | 0.18 | 0.99 | 1.70 | 1.00 | 4366 | 5347 |
| River distance | -0.25 | 0.14 | -0.53 | 0.02 | 1.00 | 5684 | 6113 |
| Survey effort | 0.31 | 0.27 | -0.16 | 0.91 | 1.00 | 7994 | 5094 |
| Area:BassaEast*Year | 0.18 | 0.28 | -0.36 | 0.75 | 1.00 | 10496 | 6555 |
| Area:BassaWest*Year | -0.80 | 0.40 | -1.59 | -0.01 | 1.00 | 12256 | 6508 |
| Area:Immigrant*Year | -1.42 | 0.20 | -1.81 | -1.05 | 1.00 | 7608 | 6328 |
| Area:Yingui*Year | -0.23 | 0.63 | -1.42 | 1.04 | 1.00 | 14327 | 6046 |
| Putty-nosed monkey | Intercept | -1.86 | 0.16 | -2.19 | -1.55 | 1.00 | 4651 | 5231 |
| Area:BassaEast | -0.10 | 0.20 | -0.49 | 0.30 | 1.00 | 6795 | 6668 |
| Area:BassaWest | -0.25 | 0.23 | -0.71 | 0.20 | 1.00 | 5805 | 6086 |
| Area:Immigrant | -0.59 | 0.22 | -1.01 | -0.17 | 1.00 | 4936 | 5894 |
| Area:Yingui | -0.23 | 0.28 | -0.79 | 0.30 | 1.00 | 8135 | 5996 |
| Year | 0.04 | 0.11 | -0.17 | 0.26 | 1.00 | 4981 | 5398 |
| Village distance | 0.26 | 0.08 | 0.10 | 0.42 | 1.00 | 6825 | 6368 |
| Ruggedness | 0.28 | 0.08 | 0.12 | 0.45 | 1.00 | 7996 | 6462 |
| Elevation | 0.16 | 0.09 | -0.03 | 0.34 | 1.00 | 5819 | 5915 |
| River distance | -0.09 | 0.07 | -0.23 | 0.05 | 1.00 | 10164 | 6422 |
| Survey effort | 0.50 | 0.18 | 0.19 | 0.90 | 1.00 | 9741 | 5052 |
| Area:BassaEast*Year | -0.06 | 0.18 | -0.40 | 0.29 | 1.00 | 6984 | 5823 |
| Area:BassaWest*Year | 0.19 | 0.19 | -0.17 | 0.56 | 1.00 | 7533 | 6412 |
| Area:Immigrant*Year | -0.25 | 0.15 | -0.54 | 0.04 | 1.00 | 5832 | 6152 |
| Area:Yingui*Year | -0.27 | 0.24 | -0.73 | 0.21 | 1.00 | 8920 | 6053 |
| Red river hog | Intercept | -0.02 | 0.13 | -0.27 | 0.23 | 1.00 | 3800 | 5218 |
| Area:BassaEast | 0.03 | 0.16 | -0.28 | 0.34 | 1.00 | 5435 | 6034 |
| Area:BassaWest | -0.40 | 0.18 | -0.76 | -0.05 | 1.00 | 4188 | 5207 |
| Area:Immigrant | -0.89 | 0.17 | -1.23 | -0.56 | 1.00 | 3987 | 4956 |
| Area:Yingui | -0.92 | 0.23 | -1.38 | -0.47 | 1.00 | 6397 | 6575 |
| Year | 0.49 | 0.09 | 0.31 | 0.68 | 1.00 | 4106 | 5233 |
| Village distance | 0.19 | 0.06 | 0.07 | 0.30 | 1.00 | 6196 | 5936 |
| Ruggedness | -0.23 | 0.06 | -0.35 | -0.11 | 1.00 | 7556 | 5874 |
| Elevation | -0.13 | 0.08 | -0.28 | 0.01 | 1.00 | 4960 | 5459 |
| River distance | 0.02 | 0.05 | -0.08 | 0.12 | 1.00 | 7893 | 5948 |
| Survey effort | 0.51 | 0.07 | 0.38 | 0.66 | 1.00 | 10131 | 6703 |
| Area:BassaEast*Year | 0.18 | 0.15 | -0.10 | 0.46 | 1.00 | 5960 | 5748 |
| Area:BassaWest*Year | 0.14 | 0.14 | -0.13 | 0.42 | 1.00 | 5381 | 5480 |
| Area:Immigrant*Year | 0.03 | 0.12 | -0.21 | 0.25 | 1.00 | 4798 | 6023 |
| Area:Yingui*Year | 0.17 | 0.21 | -0.25 | 0.60 | 1.00 | 7401 | 5806 |
| Crowned monkey | Intercept | -2.83 | 0.22 | -3.28 | -2.41 | 1.00 | 3659 | 4807 |
| Area:BassaEast | -0.51 | 0.28 | -1.07 | 0.02 | 1.00 | 6625 | 5854 |
| Area:BassaWest | -0.41 | 0.31 | -1.02 | 0.19 | 1.00 | 5899 | 6346 |
| Area:Immigrant | -0.63 | 0.29 | -1.20 | -0.06 | 1.00 | 4361 | 4920 |
| Area:Yingui | -0.66 | 0.44 | -1.57 | 0.16 | 1.00 | 7461 | 6455 |
| Year | 0.05 | 0.15 | -0.25 | 0.36 | 1.00 | 4398 | 5746 |
| Village distance | 0.31 | 0.11 | 0.09 | 0.53 | 1.00 | 6541 | 5465 |
| Ruggedness | 0.03 | 0.11 | -0.20 | 0.25 | 1.00 | 8732 | 6301 |
| Elevation | 0.22 | 0.12 | -0.02 | 0.47 | 1.00 | 4965 | 5992 |
| River distance | -0.22 | 0.10 | -0.42 | -0.02 | 1.00 | 8658 | 5910 |
| Survey effort | 0.68 | 0.30 | 0.18 | 1.38 | 1.00 | 7635 | 5076 |
| Area:BassaEast*Year | 0.11 | 0.27 | -0.41 | 0.65 | 1.00 | 6355 | 6111 |
| Area:BassaWest*Year | 0.28 | 0.29 | -0.26 | 0.85 | 1.00 | 6947 | 6318 |
| Area:Immigrant*Year | -0.15 | 0.20 | -0.54 | 0.25 | 1.00 | 5000 | 6186 |
| Area:Yingui*Year | -0.95 | 0.35 | -1.65 | -0.27 | 1.00 | 6827 | 5939 |
| Red duikers | Intercept | -1.11 | 0.14 | -1.38 | -0.85 | 1.00 | 4208 | 5436 |
| Area:BassaEast | -0.39 | 0.18 | -0.74 | -0.04 | 1.00 | 6229 | 6138 |
| Area:BassaWest | -0.22 | 0.20 | -0.60 | 0.17 | 1.00 | 5190 | 5436 |
| Area:Immigrant | -0.36 | 0.19 | -0.72 | 0.00 | 1.00 | 4064 | 5427 |
| Area:Yingui | -0.25 | 0.23 | -0.71 | 0.20 | 1.00 | 7244 | 5787 |
| Year | -0.05 | 0.10 | -0.24 | 0.15 | 1.00 | 3776 | 4788 |
| Village distance | -0.07 | 0.07 | -0.20 | 0.07 | 1.00 | 5942 | 6224 |
| Ruggedness | 0.01 | 0.07 | -0.12 | 0.15 | 1.00 | 8211 | 6100 |
| Elevation | -0.07 | 0.08 | -0.23 | 0.09 | 1.00 | 4886 | 5728 |
| River distance | -0.01 | 0.06 | -0.12 | 0.11 | 1.00 | 9440 | 6036 |
| Survey effort | -0.03 | 0.06 | -0.14 | 0.08 | 1.00 | 9452 | 6726 |
| Area:BassaEast*Year | 0.10 | 0.16 | -0.20 | 0.42 | 1.00 | 5949 | 5567 |
| Area:BassaWest*Year | -0.05 | 0.15 | -0.35 | 0.24 | 1.00 | 5334 | 5345 |
| Area:Immigrant*Year | -0.01 | 0.12 | -0.25 | 0.22 | 1.00 | 4429 | 5585 |
| Area:Yingui*Year | -0.05 | 0.20 | -0.43 | 0.34 | 1.00 | 6847 | 5662 |
| Blue duiker | Intercept | -2.19 | 0.18 | -2.56 | -1.83 | 1.00 | 3670 | 4844 |
| Area:BassaEast | -0.42 | 0.24 | -0.90 | 0.06 | 1.00 | 7744 | 6416 |
| Area:BassaWest | -0.79 | 0.28 | -1.36 | -0.24 | 1.00 | 6391 | 5973 |
| Area:Immigrant | -0.59 | 0.25 | -1.08 | -0.10 | 1.00 | 4903 | 5945 |
| Area:Yingui | -0.47 | 0.33 | -1.11 | 0.17 | 1.00 | 8125 | 5915 |
| Year | 0.22 | 0.14 | -0.06 | 0.50 | 1.00 | 4801 | 5586 |
| Village distance | -0.10 | 0.09 | -0.29 | 0.08 | 1.00 | 7619 | 6018 |
| Ruggedness | -0.06 | 0.10 | -0.25 | 0.12 | 1.00 | 9331 | 5638 |
| Elevation | -0.03 | 0.11 | -0.26 | 0.19 | 1.00 | 5664 | 5741 |
| River distance | -0.02 | 0.08 | -0.20 | 0.14 | 1.00 | 10270 | 5917 |
| Survey effort | 0.02 | 0.08 | -0.14 | 0.18 | 1.00 | 9841 | 5566 |
| Area:BassaEast*Year | -0.05 | 0.23 | -0.50 | 0.41 | 1.00 | 7122 | 6337 |
| Area:BassaWest*Year | -0.38 | 0.24 | -0.84 | 0.09 | 1.00 | 7371 | 6540 |
| Area:Immigrant*Year | -0.49 | 0.18 | -0.85 | -0.14 | 1.00 | 5726 | 5831 |
| Area:Yingui*Year | 0.22 | 0.32 | -0.39 | 0.87 | 1.00 | 8752 | 5965 |
| Hunting intensity | Intercept | 2.03 | 0.18 | 1.69 | 2.37 | 1.00 | 4054 | 5735 |
| Area:BassaEast | -0.01 | 0.23 | -0.45 | 0.44 | 1.00 | 5086 | 5609 |
| Area:BassaWest | -0.17 | 0.25 | -0.67 | 0.32 | 1.00 | 4382 | 5861 |
| Area:Immigrant | 0.58 | 0.24 | 0.11 | 1.05 | 1.00 | 3770 | 5534 |
| Area:Yingui | 0.20 | 0.30 | -0.38 | 0.78 | 1.00 | 6004 | 6771 |
| Year | 0.07 | 0.10 | -0.13 | 0.27 | 1.00 | 4726 | 5605 |
| Village distance | -0.10 | 0.08 | -0.27 | 0.06 | 1.00 | 5020 | 6479 |
| Ruggedness | -0.56 | 0.09 | -0.73 | -0.39 | 1.00 | 5430 | 5978 |
| Elevation | 0.40 | 0.11 | 0.19 | 0.60 | 1.00 | 4260 | 5734 |
| River distance | -0.01 | 0.07 | -0.15 | 0.14 | 1.00 | 5384 | 6532 |
| Area:BassaEast*Year | -0.31 | 0.15 | -0.61 | 0.00 | 1.00 | 7234 | 6397 |
| Area:BassaWest*Year | 0.06 | 0.15 | -0.25 | 0.36 | 1.00 | 6657 | 5825 |
| Area:Immigrant*Year | -0.19 | 0.12 | -0.44 | 0.05 | 1.00 | 5256 | 6590 |
| Area:Yingui*Year | -0.28 | 0.20 | -0.68 | 0.11 | 1.00 | 9177 | 6620 |
| Wire snare | Intercept | -1.69 | 0.19 | -2.07 | -1.31 | 1.00 | 6420 | 6663 |
| Area:BassaEast | -0.66 | 0.28 | -1.21 | -0.13 | 1.00 | 8790 | 6472 |
| Area:BassaWest | -0.17 | 0.28 | -0.73 | 0.36 | 1.00 | 7171 | 6908 |
| Area:Immigrant | 0.53 | 0.25 | 0.03 | 1.03 | 1.00 | 6270 | 6250 |
| Area:Yingui | 1.02 | 0.30 | 0.42 | 1.62 | 1.00 | 8140 | 6311 |
| Year | 0.18 | 0.13 | -0.08 | 0.44 | 1.00 | 6438 | 6146 |
| Village distance | -0.15 | 0.09 | -0.33 | 0.03 | 1.00 | 8573 | 6726 |
| Ruggedness | -0.13 | 0.09 | -0.31 | 0.05 | 1.00 | 9385 | 6625 |
| Elevation | -0.12 | 0.11 | -0.35 | 0.11 | 1.00 | 6986 | 6036 |
| River distance | 0.05 | 0.08 | -0.10 | 0.22 | 1.00 | 10567 | 6866 |
| Survey effort | 0.39 | 0.10 | 0.19 | 0.59 | 1.00 | 13282 | 6658 |
| Area:BassaEast*Year | -0.44 | 0.23 | -0.89 | 0.02 | 1.00 | 9521 | 6576 |
| Area:BassaWest*Year | -0.33 | 0.20 | -0.72 | 0.04 | 1.00 | 7676 | 6538 |
| Area:Immigrant*Year | -0.11 | 0.15 | -0.41 | 0.19 | 1.00 | 6669 | 6367 |
| Area:Yingui*Year | -0.43 | 0.23 | -0.88 | 0.01 | 1.00 | 9176 | 6477 |
| Shotgun cartridge | Intercept | -2.11 | 0.21 | -2.54 | -1.71 | 1.00 | 6557 | 6091 |
| Area:BassaEast | -0.69 | 0.28 | -1.26 | -0.17 | 1.00 | 11521 | 6497 |
| Area:BassaWest | -0.06 | 0.29 | -0.62 | 0.48 | 1.00 | 9182 | 6904 |
| Area:Immigrant | -0.04 | 0.26 | -0.58 | 0.47 | 1.00 | 8412 | 6489 |
| Area:Yingui | -0.46 | 0.37 | -1.20 | 0.23 | 1.00 | 11760 | 6945 |
| Year | 0.15 | 0.13 | -0.11 | 0.42 | 1.00 | 9025 | 6173 |
| Village distance | -0.09 | 0.10 | -0.28 | 0.10 | 1.00 | 10148 | 6759 |
| Ruggedness | -0.22 | 0.10 | -0.42 | -0.03 | 1.00 | 12463 | 6551 |
| Elevation | 0.36 | 0.12 | 0.14 | 0.60 | 1.00 | 8988 | 6705 |
| River distance | -0.02 | 0.09 | -0.20 | 0.15 | 1.00 | 13661 | 6382 |
| Survey effort | 0.38 | 0.14 | 0.12 | 0.68 | 1.00 | 14837 | 6160 |
| Area:BassaEast*Year | -0.21 | 0.25 | -0.69 | 0.27 | 1.00 | 11470 | 6324 |
| Area:BassaWest*Year | 0.22 | 0.22 | -0.21 | 0.64 | 1.00 | 11334 | 6989 |
| Area:Immigrant*Year | 0.22 | 0.17 | -0.11 | 0.55 | 1.00 | 9495 | 6635 |
| Area:Yingui*Year | 0.42 | 0.32 | -0.18 | 1.06 | 1.00 | 12920 | 6447 |


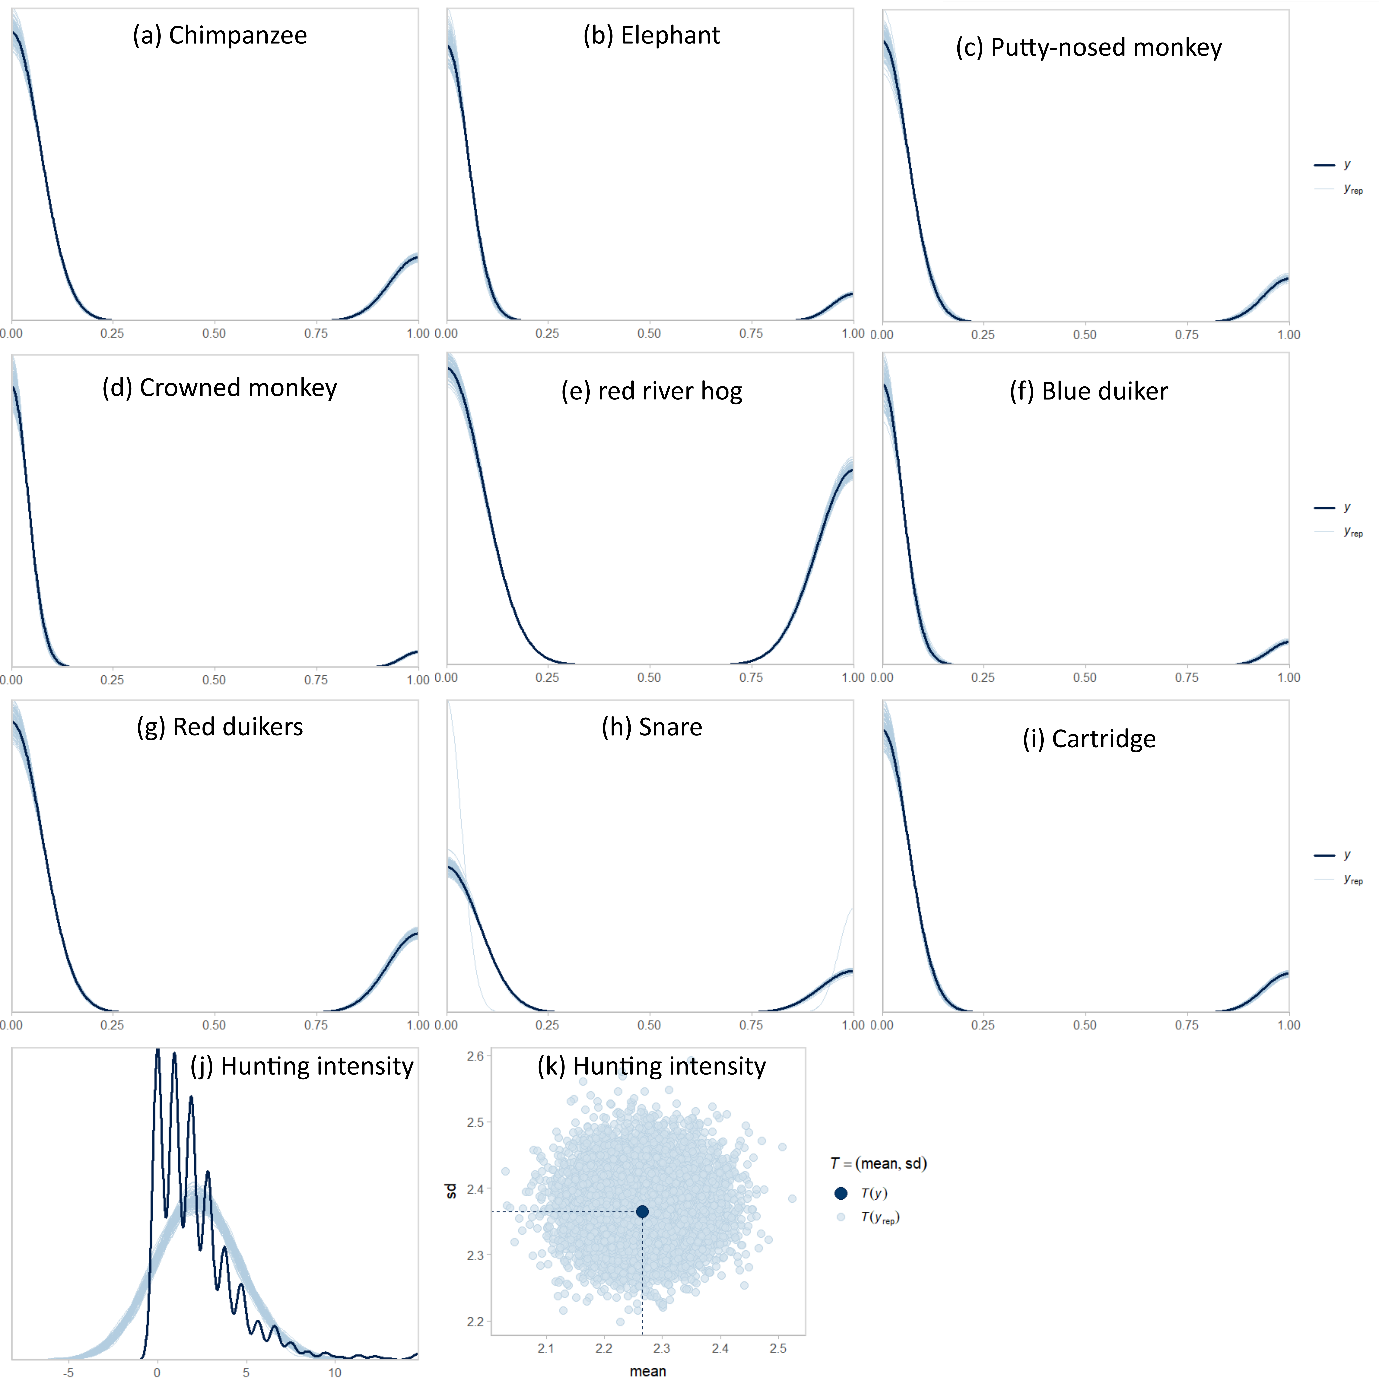


**Fig. S1** Posterior predictive check comparing the distribution of the observed data (dark lines) with the distribution of replicated datasets (thin light lines) from Bayesian regression models.
